# Supplementary material for: Mutations in the Second Alternative Oxidase Gene: A New Approach to Group Aspergillus niger Strains
Source: MDPI journal article supplement (doi:10.3390/jof9050570), 2023-05-13
Supplement: s1 [file s1]

## Supplementary Material (online)

### Mutations in the Second Alternative Oxidase Gene: A New Approach to Group *Aspergillus niger* Strains

Michel Flipphi <sup>1,†</sup>, Alexandra Márton <sup>1,2,†</sup>, Vivien Bíró <sup>1,2</sup>, Norbert Ág <sup>1</sup>,

Erzsébet Sándor <sup>3</sup>, Erzsébet Fekete <sup>1,\*</sup> and Levente Karaffa <sup>1</sup>

1 Department of Biochemical Engineering, Faculty of Science and Technology,  
University of Debrecen, H-4032 Debrecen, Hungary

2 Juhász-Nagy Pál Doctoral School of Biology and Environmental Sciences, University  
of Debrecen, H-4032 Debrecen, Hungary

3 Institute of Food Science, Faculty of Agricultural and Food Science and  
Environmental Management, University of Debrecen, H-4032 Debrecen, Hungary

\* Correspondence: kicsizsoka@yahoo.com

†These authors contributed equally to this work.

**Figure S1:** Schematic overview of branched respiratory electron transport chain in the mitochondrial inner membrane in filamentous fungi to illustrate the metabolic function of alternative oxidase (Aox) and type-II NADH dehydrogenase (And).

**Figure S2:** The intron-exon structures of the two paralogous genes for alternative oxidase and for alternative NADH dehydrogenase (oxidizing cytosolic NADH) extant in *Aspergillus niger* strain ATCC 1015.

**Figure S3:** The taxonomically aberrant position of the Onygenales AoxA clade is not a consequence of joint analysis of (orthologous) AoxA proteins with AoxB paralogs.

**Figure S4:** Alignment of opposite LTR's of the non-autonomous and autonomous copies of ANiTA2 found amongst sixteen *A. niger sensu stricto* isolates with *aoxB* disrupted by retrotransposon insertion.

**Figure S5:** Ty1/copia retrotransposon ANiTA2, autonomous copy 5129 nt.

**Figure S6:** DNA similarity between the coding region of *A. awamori aoxB* and the *aoxB* pseudo gene in *Aspergillus niger (sensu lato)* strain An76.

**Table S1:** The intron-exon structure of *aoxB* and divergently orientated *andB* genes.

**Table S2:** NCBI-lodged RNA sequence reads that cover exon-exon fusions in *aoxB* and *andB* in *A. calidoustus*, *A. implicatus* and *A. niger* strains (with full-length *aoxB* and *andB* genes).

**Table S3:** Oligonucleotide primers used for PCR amplification of the *aoxB* and *andB* genes and cDNA prior to sequence verification of mutant alleles.

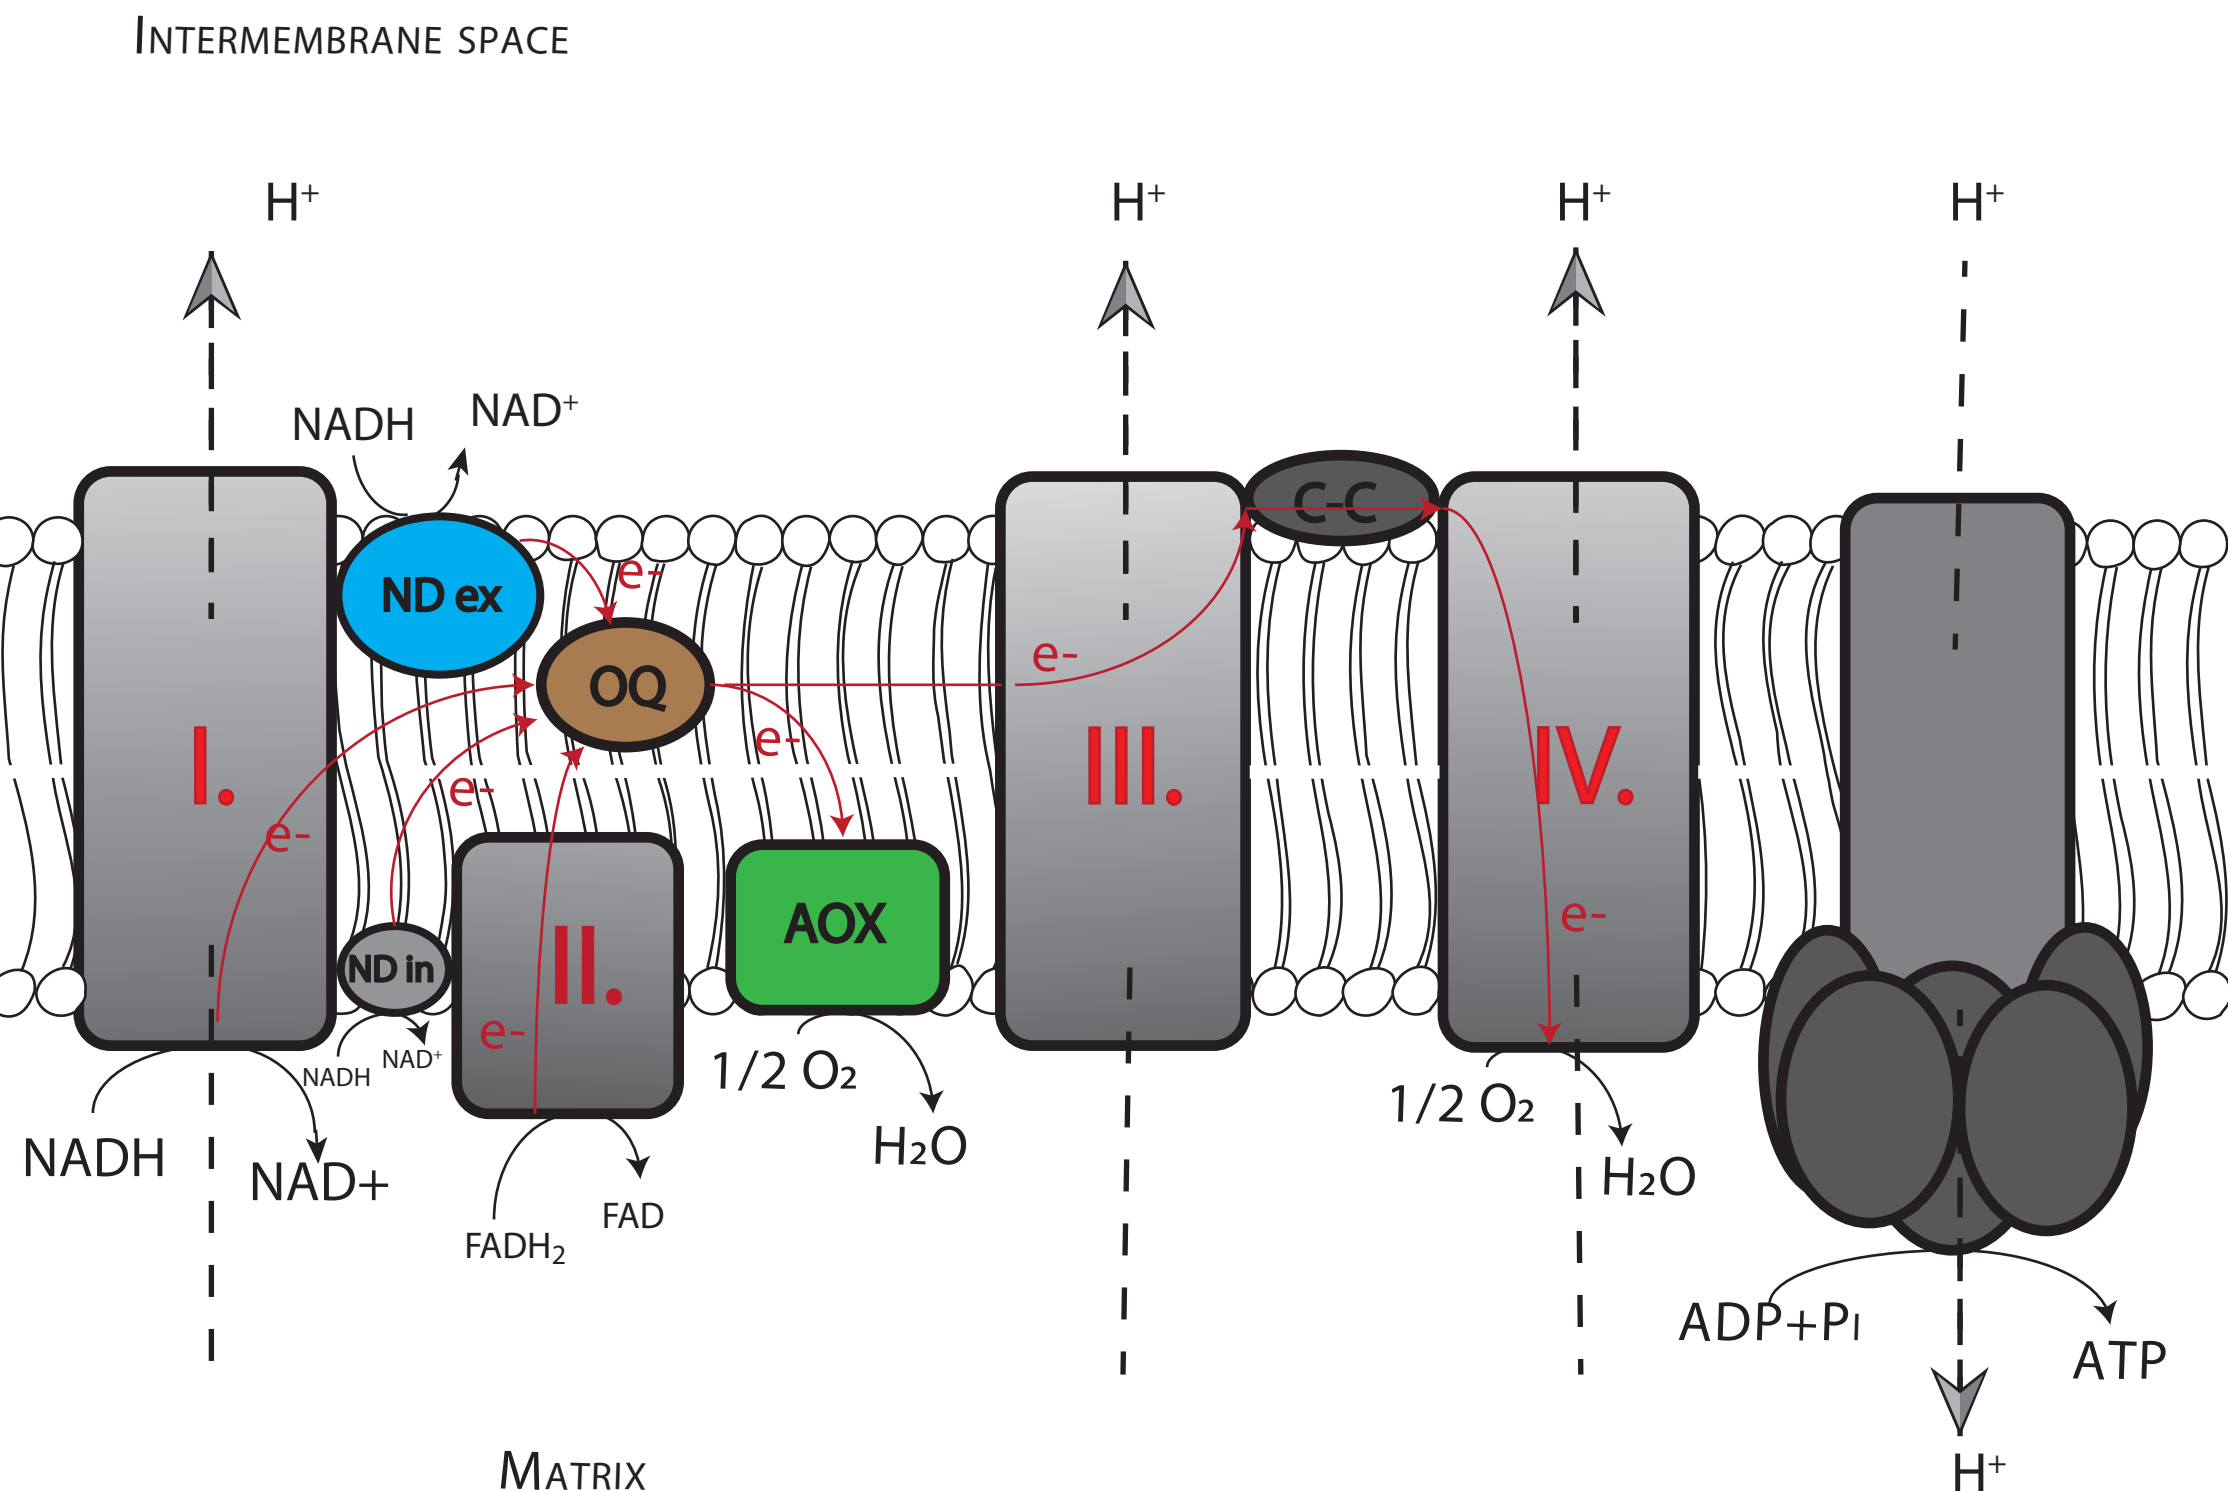

**Figure S1.** Schematic overview of branched respiratory electron transport chain in the mitochondrial inner membrane in filamentous fungi to illustrate the metabolic function of alternative oxidase (Aox) and type-II NADH dehydrogenase (And). The alternative electron fluxes are indicated in red. Associated translocation of protons over the inner membrane are shown. In the canonical chain, Type-I NADH:ubiquinone oxidoreductase (complex I), Ubiquinol:cytochrome C oxidoreductase (complex III) and Cytochrome C oxidase (complex IV), respectively, couple electron transport down the chain to proton translocation and the buildup of proton motive force that can be used to generate ATP by oxidative phosphorylation (at the right of the scheme). Complex II (succinate dehydrogenase) re-oxidizes mitochondrial  $\text{FADH}_2$  formed by the prior conversion of succinate to fumarate in the tricarboxylic acid cycle without pumping protons. Alternative oxidase (Aox; green) accepts electrons directly from the intermediate carrier ubiquinol (brown) and transfers them straight to molecular oxygen, bypassing the electrogenic, proton-translocating Complexes III and IV. NADH/ $\text{NAD}^+$  cannot pass the mitochondrial inner membrane. Alternative NADH dehydrogenases (And) or Type-II NADH:ubiquinone oxidoreductases oxidize either cytosolic (blue) or mitochondrial NADH (grey) and transfer the high-energy electrons to the ubiquinol intermediate (brown) without concomitantly pumping protons. Type-II alternative NADH dehydrogenases thus bypass the proton-translocating (Type-I) Complex I

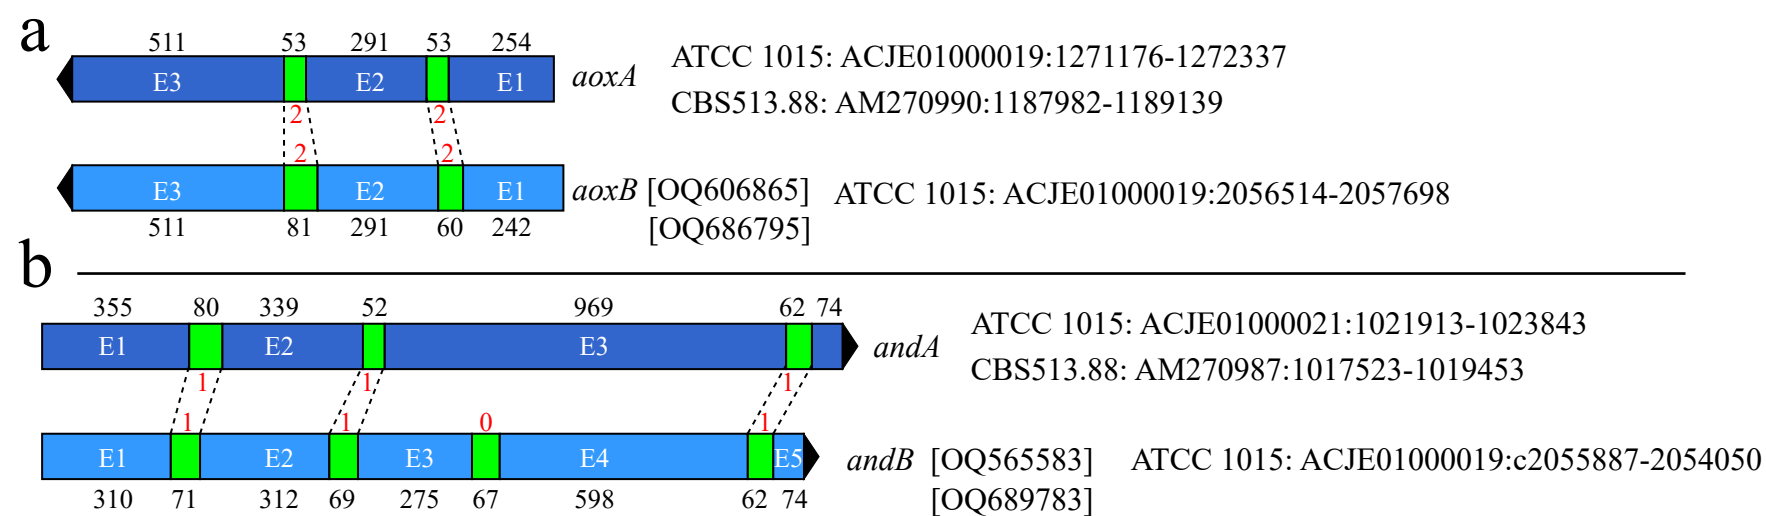

**Figure S2.** The intron-exon structures of the two paralogous genes for alternative oxidase and for alternative NADH dehydrogenase (oxidizing cytosolic NADH) extant in *Aspergillus niger* strain ATCC 1015. **(a)** Alternative oxidase genes, *aoxA* and *aoxB*. **(b)** Alternative NADH dehydrogenase genes, *andA* and *andB*. The exact location of the four genes in *A. niger* strain ATCC 1015 (sequence contig and coordinates) is mentioned to the right of the gene models. Relevant GenBank accession numbers are included. For the two ubiquitous “A” genes, the exact localisation in *A. niger* strain CBS 513.88 is also given. The exons of the coding regions (i.e., between ATG and STOP) are colored darker blue for the ubiquitous paralogous genes “A” and lighter blue for the rare paralogous genes “B”. Introns are indicated by the green color and vertically connected with the dashed lines to emphasize intron position conservation. The arrowhead gives the orientation of the genes. The intron phase is indicated by the red digit (0; 1; 2). The phase-zero third intron is lost from the ubiquitous gene for the alternative NADH dehydrogenase, *andA*.

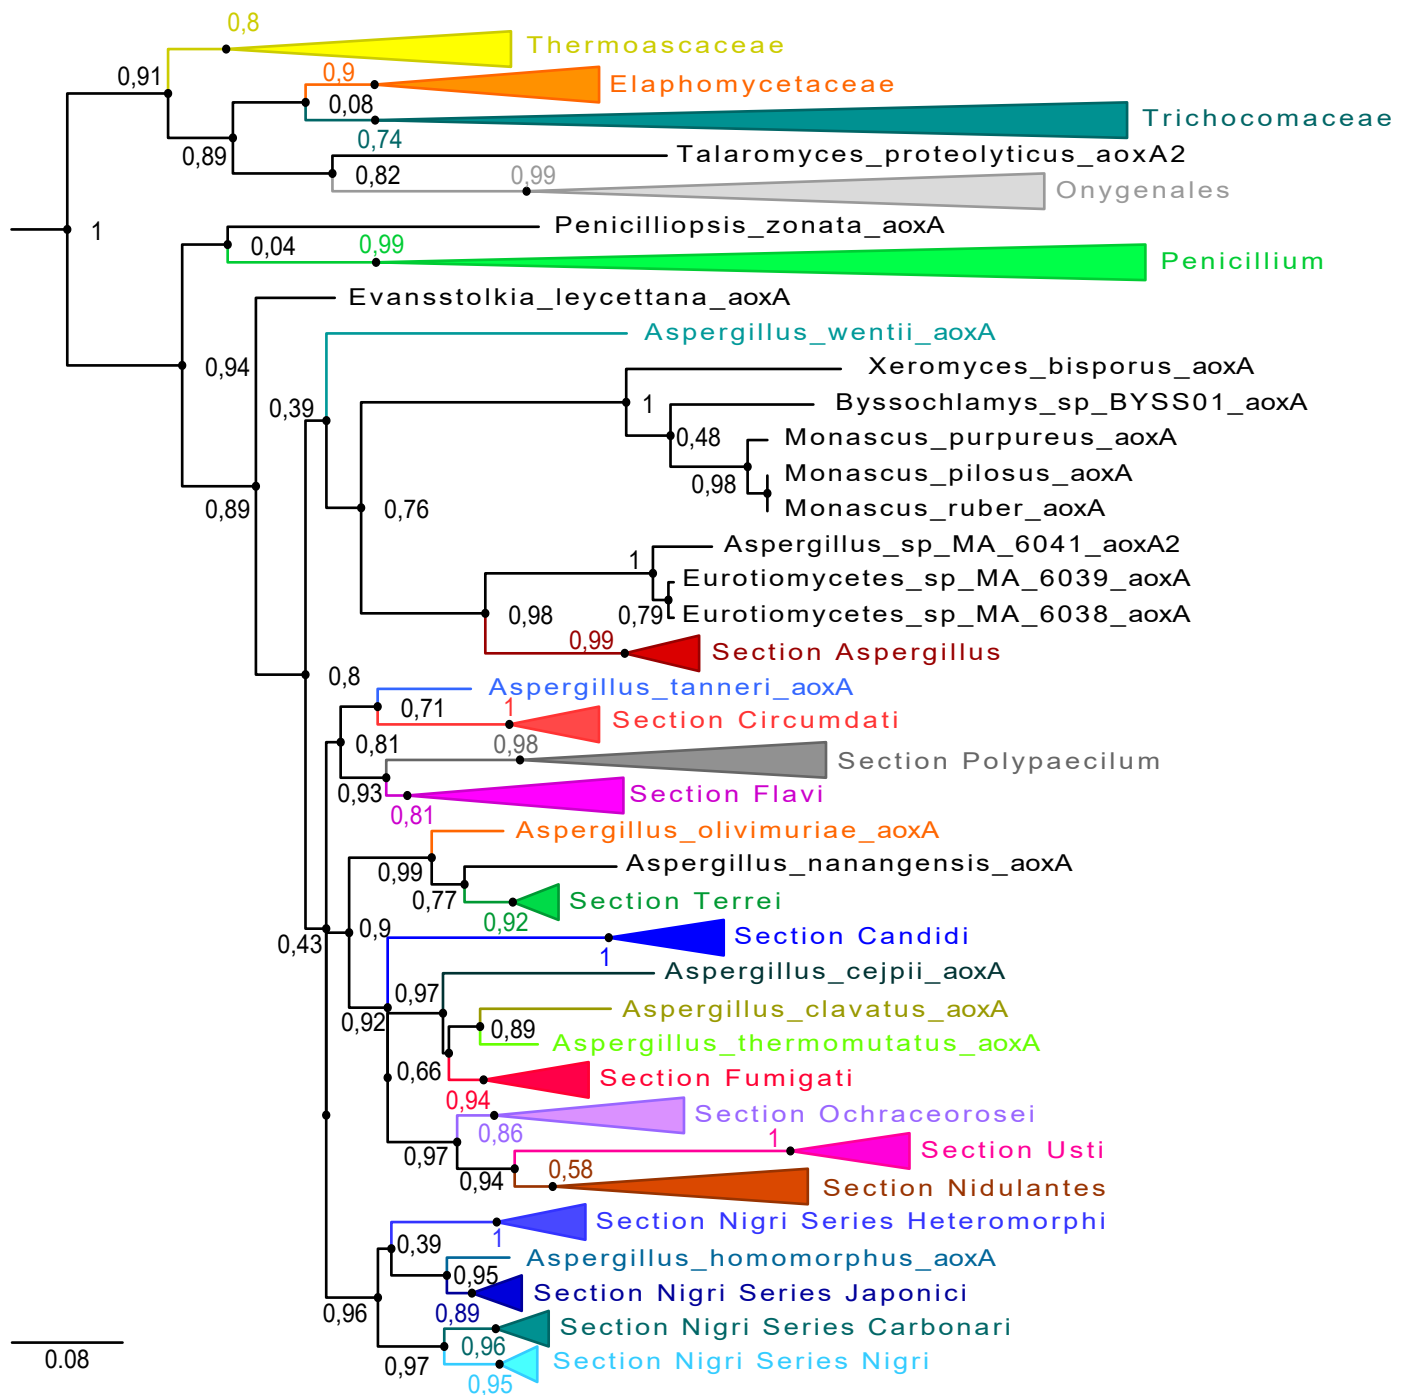

**Supplementary Figure S3.** The taxonomically aberrant position of the Onygenales AoxA clade in maximum likelihood estimations of interrelations of Aox paralogs is not a consequence of joint analysis of (orthologous) AoxA proteins with AoxB paralogs. Essentially the same clade clustering was evident from control phylogenies of exclusively the AoxA input (i.e., with the AoxB paralogs omitted). The Figure shows such a “AoxA-only” control tree constructed using exactly the same methodology for multiple sequence alignment (MAFFT), its trimming (BMGE) and the subsequent maximum likelihood inference (PhyML) (cf. legend to Figure 4b). The rooting outgroup of Lecanoromycetes AoxA was eliminated from view by subtree selection in FigTree. The clades specific to Thermoascaceae, Elaphomycetaceae, Trichocomaceae, Onygenales, the *Penicillium* genus, as well as the various *Aspergillus* sections were collapsed for a more convenient overview. However, section Nigri species were collapsed at the series level. Note the considerable evolutionary distance between the section Nigri series Nigri AoxA clade (at the bottom of the tree), the section Usti (includes *A. calidoustus*) and the estimated origin of paralogous AoxB as a sister clade of the Onygenales AoxA, near the top of the tree.

**Supplementary Figure S4.** Alignment of opposite LTR's of the non-autonomous and autonomous copies of ANiTA2 found amongst sixteen *A. niger sensu stricto* isolates with *aoxB* disrupted by retrotransposon insertion (*aoxB* allele III)

[illegible]

```
[118/162] 72.84 % ID [copy disrupting aoxB]
```

ATTTAAATGTTGAGGCAGTAACCCCTGTAGGCTCAGTCATGTGGCTGCGCTCAGGCCGCCACCAAGCGCCTCTTCGCGTGGTTGCGCTGCGTGTTTCTAGATAGTAATATAATATACTTTTACTATATTCTTCACTTTTCGTTTCTTCCGCCTGTAGTATTTGAATAGA----

-----TGTGAGATAGTAATTCTATAAACTTAATTATATGACTGTGCTTAGACTGCCTACCAAGCGCCTCTTCGTGCTGGTTGCGCTGCGCGTTCCTAGATAGTAATATAACATACTTTTATTGTATTCTTTGCTTTTCGTTTCTTCCGCCTGTAGCGTTCGAACATTTAAAT

[131/162] 80.86 % ID

[illegible]

[141/164] 85.98 % ID

[illegible]

[125/163] 76.69 % ID

[illegible]

[116/161] 72.05 % ID

-ATCAGATGTTGAGGCAGTAATCCTGTAGGCTTGGTACAGTGGCTGCGCTCAGGCCGCCACCAAGCGTTTCTTCGCGCTGGTTGCGCTGTGCATTCTAGATAGTAATATAATATACTTTTACTACATTCTTCGTTTCGTTTCTTCCGCCTGTAGTGTTTAAATAGA----  
 -----ATATTAAGATAGTAATTTTATAGATTTAGTTATGTGGCTGTGCTCAGGCCGCCTACTAAGCGCCTCTTCGTGTTGGTTGTGCTGCGCTTCTAGATAGTAATATAATATACTTTTACTGCATTCTTCGTTTCGTTTCTTCCGCCTGTAGCGTTTCAACATCGAT-----

[134/163] 82.21 % ID

[illegible]

[142/160] 88.75 %

AGAAAC TGTGTGAGGCAGTAACCCGTGTAGGCTCGGTACAGTGGCCGCGCTCAGGCCGCCACCAAGCGCCTCTTCGCGCTGGTTGCGCTGCGCGTTTCTAGATAGCAATACAACACACTTTTGCTGCATTCTTTGCGTTTGTTTCTTCTCCTGTAGTTTGAACAG-----  
-----  
-----TGTGTGAGGCAGTAACCCGTGTAGGCTCGGTACAGTGGCCGCGCTCAGGCCGCCACCAAGCGCCTCTTCGCGCTGGTTGCGCTGCGCGTTTCTAGATAGCAATACAACACACTTTTGCTGCATTCTTTGCGTTTGTTTCTTCTCCTGTAGTTTGAACAGAAAC

```
[159/159] 100 % ID [autonomous copy ANiTA2: Ty1/Copia family]
```

AGAAAC TGTGTGAGGCAGTAACCCCTGTAGGCTCGGTACAGTGGCGCGCTCAGGCCGCCACCAAGCGCCTCTTCGCGCTGGTTGCCTGCGCGTTTCTAGATAGCAATACAAACACACTTTTGCTGCATTCTTTGCGTTTGTCTTCTCTCTGTAGTTTCGAACAGAAAC

Recombined LTRs (solo LTR with TSDs)

```
[autonomous copy recombined out: solo LTR 100 % identical]
```

The target site duplication (TSD) directly up- and downstream of the transposon LTR's is highlighted by the green background.

[illegible]

LTR = 159 nt (purple: 5' & 3' = 100 % identical); TSD = 6 nt 5'-AGAAAC (green).  
ORF = 4512 nt (yellow); Integrase-RT-RNaseH polyprotein (Ty1/copia order) = 1503 AA

**Supplementary Figure S6.** DNA similarity between the coding regions of *A. awamori* *aoxB* and the *aoxB* pseudo gene in *Aspergillus niger* (sensu lato) strain An76

|               |                                                               |      |
|---------------|---------------------------------------------------------------|------|
| BDHI_Aawamori | ATGGTACGCCGAAATGCCATCCTTTTCAGCCCGATAAGCCGAAAGAGGTCAATGTACCTT  | 60   |
| BCMY_An76     | ATGATACGCCGGAATGCCGTCCTCTTCAGTCCGATAGGGCGAAGTAGGTCAATACATCCT  | 60   |
| BDHI_Aawamori | ACAAACATGCATCGCATTTTCATTGCACAACAGACCAGAAAAGCCCTTAAATCAACACAG  | 120  |
| BCMY_An76     | CCAAACATGCATCGCATTTTCATTGCACAATAACCAGGCAGACCACGGAATTAACACAA   | 120  |
| BDHI_Aawamori | CTCATACTTCTTGCTGGACAAGCGGGCTTTGCCACCTCAACTCCTTTATCATTTCAAGTTG | 180  |
| BCMY_An76     | CCGATACTTCTTGCTGGACAAGCGGGCTTTGCTACCTCCACTCCTTTATCATTTCAAGCTG | 180  |
| BDHI_Aawamori | CAATCGCCACCAACAAAATTGACCCGAATCAAGGAGACAGCTATTGTCTGGAACACCCA   | 240  |
| BCMY_An76     | CAATCACCAACCAAAAATCAACCCGAATCAAGAAGACGGCCATTGTCTGGAACACCCA    | 240  |
| BDHI_Aawamori | ATgtcagcccatatcctcccttttcacTTTTTgtgtctgtctcttctaactc----      | 295  |
| BCMY_An76     | ATatgagttcacctatctcccttttcttTTTTTgtgtctgtctcttctctgtctctcctg  | 300  |
| BDHI_Aawamori | -----ggaaagCTATACAGAAAAGGAGATTGAAATATCACTGTAGCTCATCGCGA       | 348  |
| BCMY_An76     | acaattaaaaaaaCTATACAGAGAAAAGAGATTCTGATATCACTGTGGCTCATGGCAA    | 360  |
| BDHI_Aawamori | AGCCAAATGCCTTTCTGACAAGATCGCCTTGGGCTTGGTACGTTGCTTCGATGGTGCAC   | 408  |
| BCMY_An76     | TGCTAAGTCTCTTTCTGATAAGTTCGCCTTGGCTTGGTACGTTGTCTTCGATGGTACAC   | 420  |
| BDHI_Aawamori | TGATTTCTGACTGGGTATCGAAATCCGAAAGGAAAGAAAGAAATCGCAGACAAGTTTGA   | 468  |
| BCMY_An76     | TGATTTCTGACTGGGTATCGAAATCCTGAAGGGAAAGAAAGTCGTAGACAAGTTTGA     | 479  |
| BDHI_Aawamori | TATGACTGAGAGAAAATGGCTTATTCGTTTCATTTTCTCGAATCGGTTGCTGGGTGCC    | 528  |
| BCMY_An76     | GATGACTGAGACAAAGCCAATTATTAGTTTCACCATTCTCGAATCGGTTGCAAGGTGCC   | 538  |
| BDHI_Aawamori | TGGTATGGTGGGCGGCATGCTCCGACATCTGAAGAGTATCAGACGGATGAAGAGGGATCA  | 588  |
| BCMY_An76     | CGGTATGGTGGGCGGCATGCTCCGACATTTAAAGAGTGTAGACAGATGAAGAAGGATCC   | 598  |
| BDHI_Aawamori | TGGATGgtcagttacaagggaataaaat-aattatctccaagtacttagcagtagctaca  | 646  |
| BCMY_An76     | TGGATGgtcagttgcaggggaataaaataaatatcttcaaatgttaaaagtagctaca    | 658  |
| BDHI_Aawamori | caagaagctgcagactgacacaacgcagGATCGAGTCCTTGATTGACGAAGCCTACAAC   | 706  |
| BCMY_An76     | caagaagctgctgactgacacaactgcagGATTGAGTCCTTGATTGAAGAAGCCTACAAC  | 718  |
| BDHI_Aawamori | GAGCGCATGCACCTCTTGACATTCTCGAACTGGCAGATCCAGGTATCTTCATGCGCTTA   | 766  |
| BCMY_An76     | GAGCGCATGCACCTCTTGACATTCTCGAACTGGCAGATCCAGGTATATTTCATGCGCTTC  | 778  |
| BDHI_Aawamori | GTTGTCTTGGCCGCGCAGGGCTCTTCTTCAATGCCTTCTTGTCTCCTACCTTGTTCG     | 826  |
| BCMY_An67     | ATGGTCTTGGCCGCGCAGAGCTCTTTTAAATGCCTTCTTGTCTCCTATCTCGTTCTA     | 838  |
| BDHI_Aawamori | CCCAAGACATGTCACCGGTTTGTGGATACCTAGAGGAAGAAGCTGTCATTACCTATACA   | 886  |
| BCMY_An76     | CCCAAAACATGTCACCGGTTGCTCGGATACCTACAGGAAGAAGCTGTCATTACCTTTACA  | 898  |
| BDHI_Aawamori | CACGCAATCCGTCAACTTCAAGCTGGAAAACTGCCAGCATGGGACAATTTATCAGCACCG  | 946  |
| BCMY_An76     | CCTGCAATCCATGAACCTCAAGCTGGAAAGCTGCACGCATGGGACGATCTACAGCACCG   | 958  |
| BDHI_Aawamori | GAGATTGCAATCAAATATTGGAGAATGCCAGAAAGGAAAACAGAGATGTTGATTGTGTTG  | 1006 |
| BCMY_An76     | GAGATTGCAATCAAAGATTGCAGAATGCCAAAGGAAAACAGAGATGTTGATTGTGTTG    | 1018 |
| BDHI_Aawamori | CTTTATGTTCCGGCGGATGAAGCGAAGCATCGCGAGGTTAACCATACTTTGGGAAACTTA  | 1066 |
| BCMY_An76     | CTCTATGTTCCGGATGGATGAAGCGAAGCATCGCGAGGTTAACCATACTTTGGGGA----- | 1073 |
| BDHI_Aawamori | GACGAGCATGAAGATCCCAATCCTTATACTGCGCTTTATCACGATGGGAATAATGCTGGT  | 1126 |
| BCMY_An76     | ---CAGCAAGAGATCCCAATCCTTATACTGCGCTTTATCACGAAGGGAATAATGTTGGT   | 1130 |
| BDHI_Aawamori | CCCTCAGCGTCGCCCGATGCAGGGAAGCCTATTGGATGGGAGCGAGATGAACATAATTTAG | 1186 |
| BCMY_An76     | TCCTCAGCGTCGCCATCGCAGGAAGCCTTTTGGGTTAGAGCGAATGAAGTAATTTAG     | 1190 |

Three frameshift mutations are indicated by the hyphen in the red background in the aligned An76 sequence as opposite to the green background in the *A. awamori* sequence. The 5'-donor, lariat branch point- and 3'-acceptor sequences in both introns are given in red lettering. These three sequence elements in the seemingly noncanonical first intron in An76 are in the turquoise background.

**Supplementary Table S1: The intron-exon structure of axoB and divergently orientated andB genes** from the start to the stop codon. The sequence contig and the coordinates precisely localise (the coding parts of) the exons for each gene in each fungus. The phase and size of the position-conserved introns separating consecutive exons are given. For *Aspergillus implicatus* and *Penicillium swiecicki*, the data refer to the sequence assemblies accessible at the MycoCosm website of the Joint Genome Institute (US Department of Energy). We did not use the results from autoannotation: such predictions prove incorrect in *Aspergillus niger* ATCC 1015, NRRL3 and CBS 513.88 for both axoB and andB.

|                                                                               |                      | exon1                                                           | intron1          | exon2                                                           | intron2          | exon3                                                           | intron3          | exon4                                                         | intron4          | exon5                                            |
|-------------------------------------------------------------------------------|----------------------|-----------------------------------------------------------------|------------------|-----------------------------------------------------------------|------------------|-----------------------------------------------------------------|------------------|---------------------------------------------------------------|------------------|--------------------------------------------------|
| <b>A. niger</b><br><b>ATCC1015</b><br><b>andA</b>                             | <b>NA</b>            | ACJE01000021<br>1021913-1022267<br>355 bp                       | phase 1<br>80 bp | ACJE01000021<br>1022348-1022686<br>339 bp                       | phase 1<br>52 bp | ACJE01000021<br>1022739-1023707<br>969 bp                       | phase 1<br>62 bp | ACJE01000021<br>1023770-1023843<br>74 bp                      |                  |                                                  |
| <b>A. niger</b><br><b>ATCC1015</b><br><b>axoA</b>                             |                      | ACJE01000019<br>1271176-1271429<br>254 bp                       | phase 2<br>53 bp | ACJE01000019<br>1271483-1271773<br>291 bp                       | phase 2<br>53 bp | ACJE01000019<br>1271827-1272337<br>511 bp                       |                  |                                                               |                  |                                                  |
|                                                                               | <b>ATG-<br/>CAT*</b> | exon1                                                           | intron1          | exon2                                                           | intron2          | exon3                                                           | intron3          | exon4                                                         | intron4          | exon5                                            |
| <b>A. niger</b><br><b>ATCC1015</b><br><b>andB</b>                             | 626bp                | ACJE01000019<br>c2055887-2055578<br>310 bp                      | phase 1<br>71 bp | ACJE01000019<br>c2055506-2055195<br>312 bp                      | phase 1<br>69 bp | ACJE01000019<br>c2055125-2054851<br>275 bp                      | phase 0<br>67 bp | ACJE01000019<br>c2054783-2054186<br>598 bp                    | phase 1<br>62 bp | ACJE01000019<br>c2054123-2054050<br>74 bp        |
| <b>A. niger</b><br><b>ATCC1015</b><br><b>axoB</b>                             |                      | ACJE01000019<br>2056514-2056755<br>242 bp                       | phase 2<br>60 bp | ACJE01000019<br>2056816-2057106<br>291 bp                       | phase 2<br>81 bp | ACJE01000019<br>2057188-2057698<br>511 bp                       |                  |                                                               |                  |                                                  |
| <b>A. awamori</b><br><b>IFM 58123</b><br><b>andB</b>                          | 621bp                | BDHI01000007<br>c2238650-2238341<br>310 bp                      | phase 1<br>71 bp | BDHI01000007<br>c2238269-2237958<br>312 bp                      | phase 1<br>69 bp | BDHI01000007<br>c2237888-2237614<br>275 bp                      | phase 0<br>67 bp | BDHI01000007<br>c2237546-2236949<br>598 bp                    | phase 0<br>66 bp | BDHI01000007<br>c2236882-2236809<br>74 bp        |
| <b>A. awamori</b><br><b>IFM 58123</b><br><b>axoB</b>                          |                      | BDHI01000007<br>2239272-2239513<br>242 bp                       | phase 2<br>61 bp | BDHI01000007<br>2239575-2239865<br>291 bp                       | phase 2<br>81 bp | BDHI01000007<br>2239947-2240457<br>511 bp                       |                  |                                                               |                  |                                                  |
| <b>A. welwitschiae</b><br><b>CCMB 674</b><br><b>andB</b>                      | 625bp                | PUWS01000026<br>128688-128997<br>310 bp                         | phase 1<br>71 bp | PUWS01000026<br>129069-129380<br>312 bp                         | phase 1<br>69 bp | PUWS01000026<br>129450-129724<br>275 bp                         | phase 0<br>67 bp | PUWS01000026<br>129792-130389<br>598 bp                       | phase 1<br>62 bp | PUWS01000026<br>130452-130525<br>74 bp           |
| <b>A. welwitschiae</b><br><b>CCMB 674</b><br><b>axoB</b>                      |                      | PUWS01000026<br>c128062-127821<br>242 bp                        | phase 2<br>59 bp | PUWS01000026<br>c127761-127471<br>291 bp                        | phase 2<br>81 bp | PUWS01000026<br>c127389-126879<br>511 bp                        |                  |                                                               |                  |                                                  |
| <b>A. calidoustus</b><br><b>SF006504</b><br><b>andB</b>                       | 551bp                | CDMC01000004<br>c622233-621924<br>310 bp                        | phase 1<br>49 bp | CDMC01000004<br>c621874-621536<br>339 bp                        | phase 1<br>67 bp | CDMC01000004<br>c621468-621194<br>275 bp                        | phase 0<br>73 bp | CDMC01000004<br>c621120-620526<br>595 bp                      | phase 1<br>73 bp | CDMC01000004<br>c620452-620379<br>74 bp          |
| <b>A. calidoustus</b><br><b>SF006504</b><br><b>axoB</b>                       |                      | CDMC01000004<br>622785-623020<br>236 bp                         | phase 2<br>52 bp | CDMC01000004<br>623072-623362<br>291 bp                         | phase 2<br>70 bp | CDMC01000004<br>623433-623943<br>511 bp                         |                  |                                                               |                  |                                                  |
| <b>A. implicatus</b><br><b>CBS 484.95</b><br><b>axoB</b>                      | 544bp                | Aspimp1<br>scaffold_11<br>206645-206877<br>(- strand)<br>233 bp | phase 2<br>49 bp | Aspimp1<br>scaffold_11<br>206305-206595<br>(- strand)<br>291 bp | phase 2<br>61 bp | Aspimp1<br>scaffold_11<br>205733-206243<br>(- strand)<br>511 bp |                  |                                                               |                  |                                                  |
| <b>A. implicatus</b><br><b>CBS 484.95</b><br><b>andB</b>                      |                      | Aspimp1<br>scaffold_11<br>207421-207718<br>298 bp               | phase 1<br>74 bp | Aspimp1<br>scaffold_11<br>207793-208131<br>339 bp               | phase 1<br>64 bp | Aspimp1<br>scaffold_11<br>208196-208473<br>278 bp               | phase 0<br>58 bp | Aspimp1<br>scaffold_11<br>208532-209144<br>613 bp             | phase 1<br>60 bp | Aspimp1<br>scaffold_11<br>209205-209278<br>74 bp |
| <b>A. implicatus</b><br><b>CBS 484.95</b><br><b>axoB2</b><br><b>[paralog]</b> | <b>NA</b>            | Aspimp1<br>scaffold_2<br>49588-49847<br>(- strand)<br>260 bp    | phase 2<br>57 bp | Aspimp1 scaffold_2<br>49255-49530<br>(- strand)<br>276 bp       | phase 2<br>64 bp | Aspimp1<br>scaffold_2<br>48680-49190<br>(- strand)<br>511 bp    |                  |                                                               |                  |                                                  |
| <b>P. swiecickii</b><br><b>182 6C1</b><br><b>axoB</b>                         | 613bp                | Penswil<br>scaffold_5<br>470967-471232<br>266 bp                | phase 1<br>82 bp | Penswil<br>scaffold_5<br>471315-471605<br>291 bp                | phase 0<br>60 bp | Penswil<br>scaffold_5<br>471666-472176<br>511 bp                |                  |                                                               |                  |                                                  |
| <b>P. swiecickii</b><br><b>182 6C1</b><br><b>andB</b>                         |                      | Penswil<br>scaffold_5<br>469712-470354<br>(- strand)<br>643 bp  | phase 1<br>62 bp | Penswil<br>scaffold_5<br>469372-469649<br>(- strand)<br>278 bp  | phase 0<br>57 bp | Penswil<br>scaffold_5<br>468684-469314<br>(- strand)<br>631 bp  | phase 1<br>59 bp | Penswil<br>scaffold_5<br>468551-468624<br>(- strand)<br>74 bp |                  |                                                  |

Footnote: ATG-CAT\* : The column specifies the distance between the start codons of the divergent axoB and andB genes. NA: Not applicable. The ubiquitous axoA and andA genes (top of the Table) are never linked. The A. implicatus axoB2 gene is not linked to a type-II NADH dehydrogenase gene.



**Supplementary Table S2.** NCBI-lodged RNA sequence reads that cover exon-exon fusions in *aoxB* and *andB* in *A. calidoustus*, *A. implicatus* and *A.niger* (with full-length *aoxB* and *andB* genes).

| Species Gene<br>Intron                                 | Database<br>(NCBI) | SRA reads                                                                                                          | Species Gene<br>Intron                              | Database<br>(NCBI) | SRA reads                                                                                  | Species gene<br>Intron                                | Database<br>(NCBI) | SRA reads                                                                                     |
|--------------------------------------------------------|--------------------|--------------------------------------------------------------------------------------------------------------------|-----------------------------------------------------|--------------------|--------------------------------------------------------------------------------------------|-------------------------------------------------------|--------------------|-----------------------------------------------------------------------------------------------|
|                                                        |                    |                                                                                                                    |                                                     |                    |                                                                                            |                                                       |                    |                                                                                               |
| <b>A.calidoustus<br/>andB intron 1</b><br>TTAGGCACT    | ERX631993          | ERR677102.16649058.2                                                                                               | <b>A.calidoustus<br/>aoxB intron 1</b><br>CCAATCTAC | ERX631996          | ERR677105.6854148.2                                                                        |                                                       |                    |                                                                                               |
|                                                        | ERX631995          | ERR677104.15682812.1<br>ERR677104.15682812.2                                                                       |                                                     | ERX631995          | ERR677104.2332297.1                                                                        | <b>A.implicatus<br/>andB intron 1</b><br>CTGGGCACT    | SRX5208515         | not covered                                                                                   |
|                                                        | ERX631996          | ERR677105.2162584.1<br>ERR677105.2162584.2                                                                         |                                                     | ERX631994          | ERR677103.2510794.2<br>ERR677103.1656912.1<br>ERR677103.900396.2                           | <b>A.implicatus<br/>andB intron 2</b><br>TTTGGAATC    | SRX5208515         | SRR8399217.21403927.2<br>SRR8399217.387016.1                                                  |
| <b>A.calidoustus<br/>andB intron 2</b><br>TTTGGATT     | ERX631988          | ERR677097.373254.2                                                                                                 |                                                     | ERX631993          | ERR677102.2082084.2                                                                        | <b>A.implicatus<br/>andB intron 3</b><br>CCCTCGATTTTA | SRX5208515         | not covered                                                                                   |
|                                                        | ERX631990          | ERR677099.18680577.2<br>ERR677099.18680577.1<br>ERR677099.2869718.1                                                |                                                     | ERX631992          | ERR677101.10577410.1<br>ERR677101.8218975.1<br>ERR677101.8193533.1                         | <b>A.implicatus<br/>andB intron 4</b><br>AGTGTCCAG    | SRX5208515         | SRR8399217.2264778.1<br>SRR8399217.25258407.1<br>SRR8399217.992531.1<br>SRR8399217.23243498.1 |
|                                                        | ERX631993          | ERR677102.14622834.2                                                                                               |                                                     |                    |                                                                                            |                                                       |                    |                                                                                               |
|                                                        | ERX631991          | ERR677100.9382643.1                                                                                                |                                                     |                    |                                                                                            |                                                       |                    |                                                                                               |
|                                                        | ERX631996          | ERR677105.17252672.2<br>ERR677105.17252672.1                                                                       | <b>A.calidoustus<br/>aoxB intron 2</b><br>GGATGGATT | ERX631996          | ERR677105.2013743.2                                                                        |                                                       |                    |                                                                                               |
| <b>A.calidoustus<br/>andB intron 3</b><br>CCTTCTGTGCTT | ERX631989          | ERR677098.13859357.2<br>ERR677098.2998495.2<br>ERR677098.2998495.1<br>ERR677098.22770266.2<br>ERR677098.13859357.1 |                                                     | ERX631995          | ERR677104.16482873.2<br>ERR677104.16482873.1                                               | <b>A.implicatus<br/>aoxB intron 1</b><br>CCAATCTAT    | SRX5208515         | SRR8399217.6320403.2                                                                          |
| <b>A.calidoustus<br/>andB intron 4</b><br>AGTGC CCGG   | ERX631992          | ERR677101.1542532.2<br>ERR677101.1542532.1                                                                         |                                                     | ERX631994          | ERR677103.1971655.2                                                                        |                                                       |                    |                                                                                               |
|                                                        | ERX631994          | ERR677103.6474623.1<br>ERR677103.6474623.2                                                                         |                                                     | ERX631993          | ERR677102.23350232.2<br>ERR677102.10276109.2<br>ERR677102.4764038.2<br>ERR677102.4764038.1 | <b>A.implicatus<br/>aoxB intron 2</b><br>GGATGGATC    | SRX5208515         | SRR8399217.23319380.2<br>SRR8399217.8293776.1<br>SRR8399217.6320403.1                         |
|                                                        | ERX631993          | ERR677102.17188126.1<br>ERR677102.17188126.2<br>ERR677102.12370809.2                                               |                                                     | ERX631992          | ERR677101.7231996.1                                                                        |                                                       |                    |                                                                                               |
| <b>A.niger<br/>aoxB intron 1</b><br>CCAATCTAC          | SRX9722265         | SRR13293334.22709813.2                                                                                             | <b>A.niger<br/>andB intron 1</b><br>AGTGCCTAA       | SRX11975055        | SRR15678655.579521.2                                                                       | <b>A.niger<br/>andB intron 3</b><br>TAGGACAGA         | SRX12789281        | SRR16587860.3272965.1                                                                         |
| <b>A.niger aoxB<br/>intron 2</b><br>GGATGGATC          | SRX11975789        | SRR15679403.6264149.1                                                                                              | <b>A.niger<br/>andB intron 2</b><br>TATCCAAA        | SRX11975055        | SRR15678655.579521.1                                                                       | <b>A.niger<br/>andB intron 4</b><br>CCGAGAGCT         | SRX18320010        | SRR22348904.213785.1                                                                          |
|                                                        |                    |                                                                                                                    |                                                     | SRX12789281        | SRR16587860.708123.1                                                                       |                                                       |                    |                                                                                               |
|                                                        |                    |                                                                                                                    |                                                     | SRX15688375        | SRR19638148.2825246.1                                                                      |                                                       |                    |                                                                                               |

Footnote: Per database, a maximum of five SRAs covering the exon-exon junction after excision of the indicated intron are given.

| Strain gene<br>Intron                       | Database<br>(NCBI) | SRA reads                                                                                                                                          |
|---------------------------------------------|--------------------|----------------------------------------------------------------------------------------------------------------------------------------------------|
| A. implicatus<br>aoxB2 intron1<br>CCTGTATAC | SRX5208515         | SRR8399217.31224079.1<br>SRR8399217.30796192.2<br>SRR8399217.30796192.1<br>SRR8399217.29964246.2<br>SRR8399217.29933532.2<br>SRR8399217.29533741.1 |
| A. implicatus<br>aoxB2 intron2<br>GGGTGGATC | SRX5208515         | SRR8399217.31331017.2<br>SRR8399217.31167892.1<br>SRR8399217.30842627.2<br>SRR8399217.29836882.2<br>SRR8399217.29657382.2<br>SRR8399217.29442532.1 |

**Table S3.** Oligonucleotide primers used for PCR amplification of the *aoxB* and *andB* genes and cDNA prior to sequence verification of mutant alleles.

| Strain                                                             | Primer                              | Sequence (5'-)        |
|--------------------------------------------------------------------|-------------------------------------|-----------------------|
| <i>Aspergillus niger</i> ATCC 1015<br><i>aoxB</i> and cDNA         | 1015- <i>aoxB</i> -5prime-Fw1       | CGTTCGATCTTCTCGCTAAG  |
|                                                                    | 1015- <i>aoxB</i> -intern-Rv1       | GTGTATAGGTAATGACAGCT  |
|                                                                    | 1015- <i>aoxB</i> -intern-Fw2       | GTGCACTGATTTCGTGACTG  |
|                                                                    | 1015- <i>aoxB</i> -3prime-Rv2       | CCATAAAGAATAACACCTGA  |
|                                                                    | 1015- <i>aoxB</i> -5prime-cDNA-Fw1  | ATCCCTGCCGAGGTGTCCAA  |
|                                                                    | 1015- <i>aoxB</i> -5prime-cDNA2-Fw1 | GAGACAGCTATTGTCTGGAA  |
|                                                                    | 1015- <i>aoxB</i> -intern-cDNA-Rv1  | TGACAGCTTCTTCCCTCCAGG |
| <i>Aspergillus niger</i> ATCC 1015<br><i>andB</i> gene and cDNA    | 1015- <i>andB</i> -3prime-Fw1       | GCTCGGTACCGAGGAAAGT   |
|                                                                    | 1015- <i>andB</i> -intern-Rv1       | GAGCAGAATGACACTGAGCT  |
|                                                                    | 1015- <i>andB</i> -intern-Fw2       | GGAAACAGTCTCTGTACATC  |
|                                                                    | 1015- <i>andB</i> -5prime-Rv2       | GAACCAGGCCAGATATACAGC |
|                                                                    | 1015- <i>andB</i> -5prime-cDNA1-Rv2 | AGTAGAGGCAGATCCGTCAA  |
|                                                                    | 1015- <i>andB</i> -5prime-cDNA2-Rv2 | CCAGGCCAGATATACAGCCTA |
| <i>Aspergillus niger</i> CBS 554.65<br><i>aoxB</i> and <i>andB</i> | 1015- <i>andB</i> -3prime-Fw1       | GCTCGGTACCGAGGAAAGT   |
|                                                                    | 1015- <i>aoxB</i> -intern-Rv1       | GTGTATAGGTAATGACAGCT  |
|                                                                    | 554-65_ <i>andB</i> -special-Fw1    | GCAAGAGATCCTTGGTGAGT  |
|                                                                    | 554-65_ <i>andB</i> -special-Fw2    | AGTTGCACTGTATCTCGTTG  |
| <i>Aspergillus niger</i> CBS 147343<br><i>aoxB</i>                 | 1015- <i>aoxB</i> -5prime-Fw1       | CGTTCGATCTTCTCGCTAAG  |
|                                                                    | 554-65_ <i>aoxB</i> -intern-Rv1     | GTGTATAGGTGATGACAGCT  |
|                                                                    | 1015- <i>aoxB</i> -intern-Fw2       | GTGCACTGATTTCGTGACTG  |
|                                                                    | 124-48_ transposon-Rv1              | CTACAGGGTTACTACCTCAA  |
|                                                                    | 124-48_ transposon-Fw1              | CCGCCTGTAGCGTTCGAACA  |
|                                                                    | 1015- <i>aoxB</i> -3prime-Rv2       | CCATAAAGAATAACACCTGA  |
| <i>Aspergillus niger</i> CBS 630.78<br><i>aoxB</i>                 | 630-78- <i>aoxB</i> -5prime-Fw1     | CGTTTGATCTTCTCGCTAAG  |
|                                                                    | 1015- <i>aoxB</i> -intern-Rv1       | GTGTATAGGTAATGACAGCT  |
|                                                                    | 1015- <i>aoxB</i> -intern-Fw2       | GTGCACTGATTTCGTGACTG  |
|                                                                    | 630-78- <i>aoxB</i> -3prime-Rw2     | CCATAAGAATAACACCTGAA  |
| <i>Aspergillus niger</i> CBS 769.97<br><i>aoxB</i>                 | 630-78- <i>aoxB</i> -5prime-Fw1     | CGTTTGATCTTCTCGCTAAG  |
|                                                                    | 1015- <i>aoxB</i> -intern-Rv1       | GTGTATAGGTAATGACAGCT  |
|                                                                    | 1015- <i>aoxB</i> -intern-Fw2       | GTGCACTGATTTCGTGACTG  |
|                                                                    | 630-78- <i>aoxB</i> -3prime-Rw2     | CCATAAGAATAACACCTGAA  |
